# Supplementary material
Source: HighWire-hosted journal article supplement (https://drc.bmj.com/content/6/1/e000464)
Supplement: inline-supplementary-material-1 [file inline-supplementary-material-1.docx]

Supplementary Appendix

This appendix has been provided by the authors to give readers additional information about their work.

Supplement to:

**Variables associated with HbA1c and weight reductions when adding liraglutide to multiple daily insulin injections in persons with type 2 diabetes (MDI Liraglutide trial 3)**

Sofia Dahlqvist,1 Elsa Ahlén,1,2,3 Karin Filipsson,4,5 Thomas Gustafsson,6 Irl B Hirsch,7 Jaakko Tuomilehto,8,9,10 Henrik Imberg,11,12 Bo Ahrén,4 Stig Attvall,3 Marcus Lind1,3

1Department of Medicine, NU Hospital Group, Uddevalla, Sweden

2Värnamo Hospital, Värnamo, Sweden

3Department of Molecular and Clinical Medicine, University of Gothenburg, Gothenburg, Sweden

4Department of Clinical Sciences Lund, Lund University, Lund, Sweden

5Department of Endocrinology, Skåne University Hospital, Scania, Sweden

6Department of Clinical Chemistry, Karolinska University Hospital, Stockholm, Sweden

7Division of Metabolism, Endocrinology, and Nutrition, University of Washington, Seattle, Washington, USA

8Department of Chronic Disease Prevention, National Institute for Health and Welfare, Helsinki, Finland

9Diabetes Research Group, King Abdulaziz University, Jeddah, Saudi Arabia

10Research Division, Dasman Diabetes Institute, Dasman, Kuwait

11Statistiska Konsultgruppen, Gothenburg, Sweden

12Department of Mathematical Sciences, Chalmers University of Technology and the University of Gothenburg, Gothenburg, Sweden.

# Table of contents

1 Table of contents 2

2 Tables 3

2.1 Table S1. Predictors of effect on HbA1c reduction (mmol/mol) 3

2.2 Table S2. Predictors of effect on weight reduction (kg) 4

2.3 Table S3. Predictors of effect on reduction in total daily insulin dose (units) 5

# Tables

## Table S1. Predictors of effect on HbA1c reduction (mmol/mol)

| **Baseline predictor** | **Regression coefficient (95% CI)** | | |
| --- | --- | --- | --- |
| **Liraglutide** | **Placebo** | **Liraglutide-Placebo** |
| Abdominal sagittal diameter (cm) | 0.17 (-0.55; 0.90) p=0.64 | 0.28 (-0.49; 1.05) | -0.11 (-1.17; 0.95) |
| Adiponectin (mg/l) | 0.18 (-0.99; 1.35) p=0.76 | 0.89 (-0.30; 2.09) | -0.71 (-2.38; 0.96) |
| Age (years) | -0.10 (-0.40; 0.21) p=0.54 | -0.01 (-0.35; 0.33) | -0.09 (-0.54; 0.38) |
| BMI (kg/m2) | 0.19 (-0.41; 0.78) p=0.54 | 0.17 (-0.48; 0.83) | 0.01 (-0.87; 0.90) |
| CGM Mean (mmol/l) | -1.39 (-2.46; -0.32) p=0.012 | -0.69 (-1.85; 0.48) | -0.70 (-2.28; 0.88) p=0.38 |
| CGM SD (mmol/l) | -0.03 (-3.65; 3.59) p=0.99 | -1.54 (-4.94; 1.85) | 1.51 (-3.45; 6.48) |
| Diabetes duration (years) | -0.10 (-0.43; 0.23) p=0.56 | -0.28 (-0.59; 0.04) | 0.18 (-0.28; 0.63) |
| Metformin usage | 2.85 (-2.52; 8.22) p=0.30 | 3.72 (-2.10; 9.53) | -0.87 (-8.78; 7.05) |
| Fasting C-peptide (nmol/l) | -3.97 (-9.27; 1.32) p=0.14 | 0.89 (-4.40; 6.17) | -4.86 (-12.34; 2.62) |
| Fasting proinsulin (pmol/l) | -0.11 (-0.22; -0.00) p=0.047 | 0.07 (-0.05; 0.19) | -0.18 (-0.34; -0.02) p=0.026 |
| Female sex | -2.82 (-8.04; 2.40) p=0.29 | 1.58 (-3.91; 7.06) | -4.44 (-11.97; 3.18) |
| HbA1c (IFCC) (mmol/mol) | -0.28 (-0.50; -0.05) p=0.018 | -0.20 (-0.41; 0.01) | -0.07 (-0.38; 0.24) p=0.64 |
| Percent meal insulin of total insulin | -4.63 (-25.69; 16.42) p=0.66 | -4.11 (-23.54; 15.32) | -0.52 (-29.17; 28.12) |
| Total daily insulin dose (units) | 0.01 (-0.05; 0.07) p=0.77 | -0.02 (-0.08; 0.05) | 0.03 (-0.06; 0.11) |
| Waist circumference (cm) | 0.08 (-0.16; 0.32) p=0.50 | -0.07 (-0.30; 0.17) | 0.15 (-0.19; 0.49) |
| Waist-hip-ratio | 21.63 (-14.01; 57.27) p=0.23 | 5.85 (-32.44; 44.14) | 15.78 (-36.53; 68.09) |
| Weight (kg) | 0.07 (-0.11; 0.25) p=0.43 | -0.03 (-0.21; 0.14) | 0.10 (-0.15; 0.36) |
| Statistical tests were performed in the liraglutide group only, and tests for treatment with predictor interactions were performed only for predictors that were significant in the liraglutide group at the 5% level. | | | |

## Table S2. Predictors of effect on weight reduction (kg)

| **Baseline predictor** | **Regression coefficient (95% CI)** | | |
| --- | --- | --- | --- |
| **Liraglutide** | **Placebo** | **Liraglutide-Placebo** |
| Abdominal sagittal diameter (cm) | 0.25 (0.05; 0.46) p=0.016 | -0.19 (-0.41; 0.02) | 0.45 (0.15; 0.74) p=0.004 |
| Adiponectin (mg/l) | -0.22 (-0.56; 0.12) p=0.21 | -0.08 (-0.43; 0.27) | -0.14 (-0.62; 0.35) |
| Age (years) | -0.01 (-0.10; 0.08) p=0.75 | -0.02 (-0.12; 0.08) | 0.00 (-0.13; 0.14) |
| BMI (kg/m2) | 0.10 (-0.08; 0.27) p=0.27 | -0.09 (-0.28; 0.10) | 0.19 (-0.07; 0.44) |
| CGM Mean (mmol/l) | 0.48 (0.17; 0.79) p=0.003 | 0.07 (-0.27; 0.41) | 0.41 (-0.05; 0.87) p=0.08 |
| CGM SD (mmol/l) | 0.75 (-0.30; 1.80) p=0.16 | 0.37 (-0.61; 1.35) | 0.38 (-1.06; 1.82) |
| Diabetes duration (years) | 0.01 (-0.08; 0.11) p=0.78 | 0.03 (-0.07; 0.12) | -0.01 (-0.15; 0.12) |
| Metformin usage | -1.39 (-2.95; 0.17) p=0.08 | 0.29 (-1.41; 1.98) | -1.67 (-3.98; 0.63) |
| Fasting C-peptide (nmol/l) | 0.46 (-1.08; 2.01) p=0.55 | -1.14 (-2.68; 0.40) | 1.60 (-0.58; 3.78) |
| Fasting proinsulin (pmol/l) | 0.02 (-0.01; 0.05) p=0.21 | -0.06 (-0.09; -0.02) | 0.08 (0.03; 0.12) |
| Female sex | -0.78 (-2.30; 0.75) p=0.32 | -0.52 (-2.12; 1.08) | -0.26 (-2.47; 1.95) |
| HbA1c (IFCC) (mmol/mol) | 0.10 (0.04; 0.17) p=0.002 | -0.00 (-0.06; 0.06) | 0.12 (0.02; 0.20) p=0.020 |
| Percent meal insulin of total insulin | -4.12 (-10.21; 1.98) p=0.18 | 1.81 (-3.81; 7.43) | -5.93 (-14.22; 2.37) |
| Total daily insulin dose (units) | 0.01 (-0.01; 0.03) p=0.20 | -0.01 (-0.03; 0.01) | 0.02 (-0.00; 0.05) |
| Waist circumference (cm) | 0.06 (-0.01; 0.13) p=0.10 | -0.04 (-0.12; 0.03) | 0.10 (0.00; 0.21) |
| Waist-hip-ratio | 3.14 (-8.08; 14.37) p=0.58 | -2.28 (-14.34; 9.78) | 5.42 (-11.05; 21.90) |
| Weight (kg) | 0.05 (-0.00; 0.10) p=0.06 | -0.02 (-0.07; 0.03) | 0.07 (-0.01; 0.14) |
| Statistical tests were performed in the liraglutide group only, and tests for treatment with predictor interactions were performed only for predictors that were significant in the liraglutide group at the 5% level. | | | |

## Table S3. Predictors of effect on reduction in total daily insulin dose (units)

| **Baseline predictor** | **Regression coefficient (95% CI)** | | |
| --- | --- | --- | --- |
| **Liraglutide** | **Placebo** | **Liraglutide-Placebo** |
| Abdominal sagittal diameter (cm) | 1.52 (0.02; 3.03) p=0.048 | 0.15 (-1.46; 1.76) | 1.38 (-0.83; 3.58) p=0.22 |
| Adiponectin (mg/l) | 1.50 (-1.01; 4.00) p=0.24 | 0.11 (-2.45; 2.66) | 1.39 (-2.19; 4.98) |
| Age (years) | 0.15 (-0.51; 0.81) p=0.65 | 0.24 (-0.49; 0.97) | -0.09 (-1.07; 0.89) |
| BMI (kg/m2) | -0.34 (-1.61; 0.93) p=0.60 | -0.12 (-1.52; 1.28) | -0.22 (-2.11; 1.68) |
| CGM Mean (mmol/l) | 1.84 (-0.50; 4.17) p=0.12 | 1.28 (-1.26; 3.82) | 0.56 (-2.90; 4.01) |
| CGM SD (mmol/l) | -1.86 (-9.64; 5.91) p=0.64 | 0.64 (-6.66; 7.94) | -2.50 (-13.17; 8.16) |
| Diabetes duration (years) | -0.23 (-0.94; 0.48) p=0.52 | 0.10 (-0.59; 0.79) | -0.33 (-1.32; 0.66) |
| Metformin usage | -3.32 (-14.91; 8.28) p=0.57 | -3.04 (-15.58; 9.51) | -0.28 (-17.36; 16.81) |
| Fasting C-peptide (nmol/l) | -7.57 (-18.93; 3.78) p=0.19 | 1.07 (-10.26; 12.40) | -8.64 (-24.68; 7.40) |
| Fasting proinsulin (pmol/l) | -0.03 (-0.26; 0.20) p=0.80 | -0.03 (-0.29; 0.22) | 0.00 (-0.34; 0.35) |
| Female sex | -11.82 (-22.81; -0.82) p=0.035 | -4.78 (-16.34; 6.78) | -7.03 (-22.99; 8.92) p=0.38 |
| HbA1c (IFCC) (mmol/mol) | 0.35 (-0.15; 0.85) p=0.17 | -0.05 (-0.52; 0.41) | 0.40 (-0.28; 1.08) |
| Percent meal insulin of total insulin | -40.21 (-84.57; 4.14) p=0.08 | -18.68 (-59.62; 22.25) | -21.53 (-81.89; 38.83) |
| Total daily insulin dose (units) | -0.19 (-0.31; -0.08) p=0.001 | -0.13 (-0.26; -0.01) | -0.06 (-0.23; 0.11) p=0.50 |
| Waist circumference (cm) | 0.07 (-0.49; 0.62) p=0.81 | 0.04 (-0.51; 0.59) | 0.02 (-0.76; 0.80) |
| Waist-hip-ratio | 37.87 (-46.34; 122.08) p=0.37 | 7.75 (-82.71; 98.22) | 30.12 (-93.48; 153.71) |
| Weight (kg) | 0.30 (-0.08; 0.68) p=0.12 | 0.02 (-0.35; 0.40) | 0.28 (-0.26; 0.81) |
| Statistical tests were performed in the liraglutide group only, and tests for treatment with predictor interactions were performed only for predictors that were significant in the liraglutide group at the 5% level. | | | |
